# Supplementary material
Source: Springer Nature journal article supplement (https://www.springermedizin.de/resource/supplementary/12935_2013_394_MOESM3_ESM.pdf/9540522)

# Kasumi-1

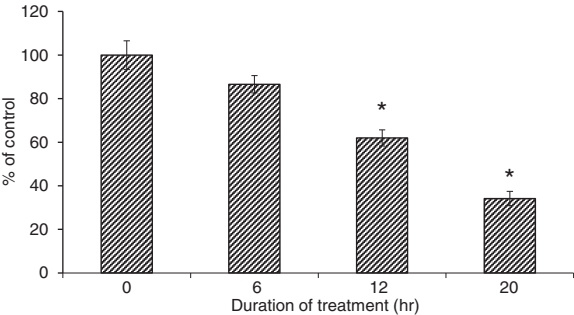

Supplement: MOESM3 [file 9540522]
